# Supplementary material
Source: PubMed Central journal article supplement (PMC9832393)
Supplement: NIHMS1060289-supplement-Supp_FigS1.pdf [file NIHMS1060289-supplement-Supp_FigS1.pdf]

Supporting Information

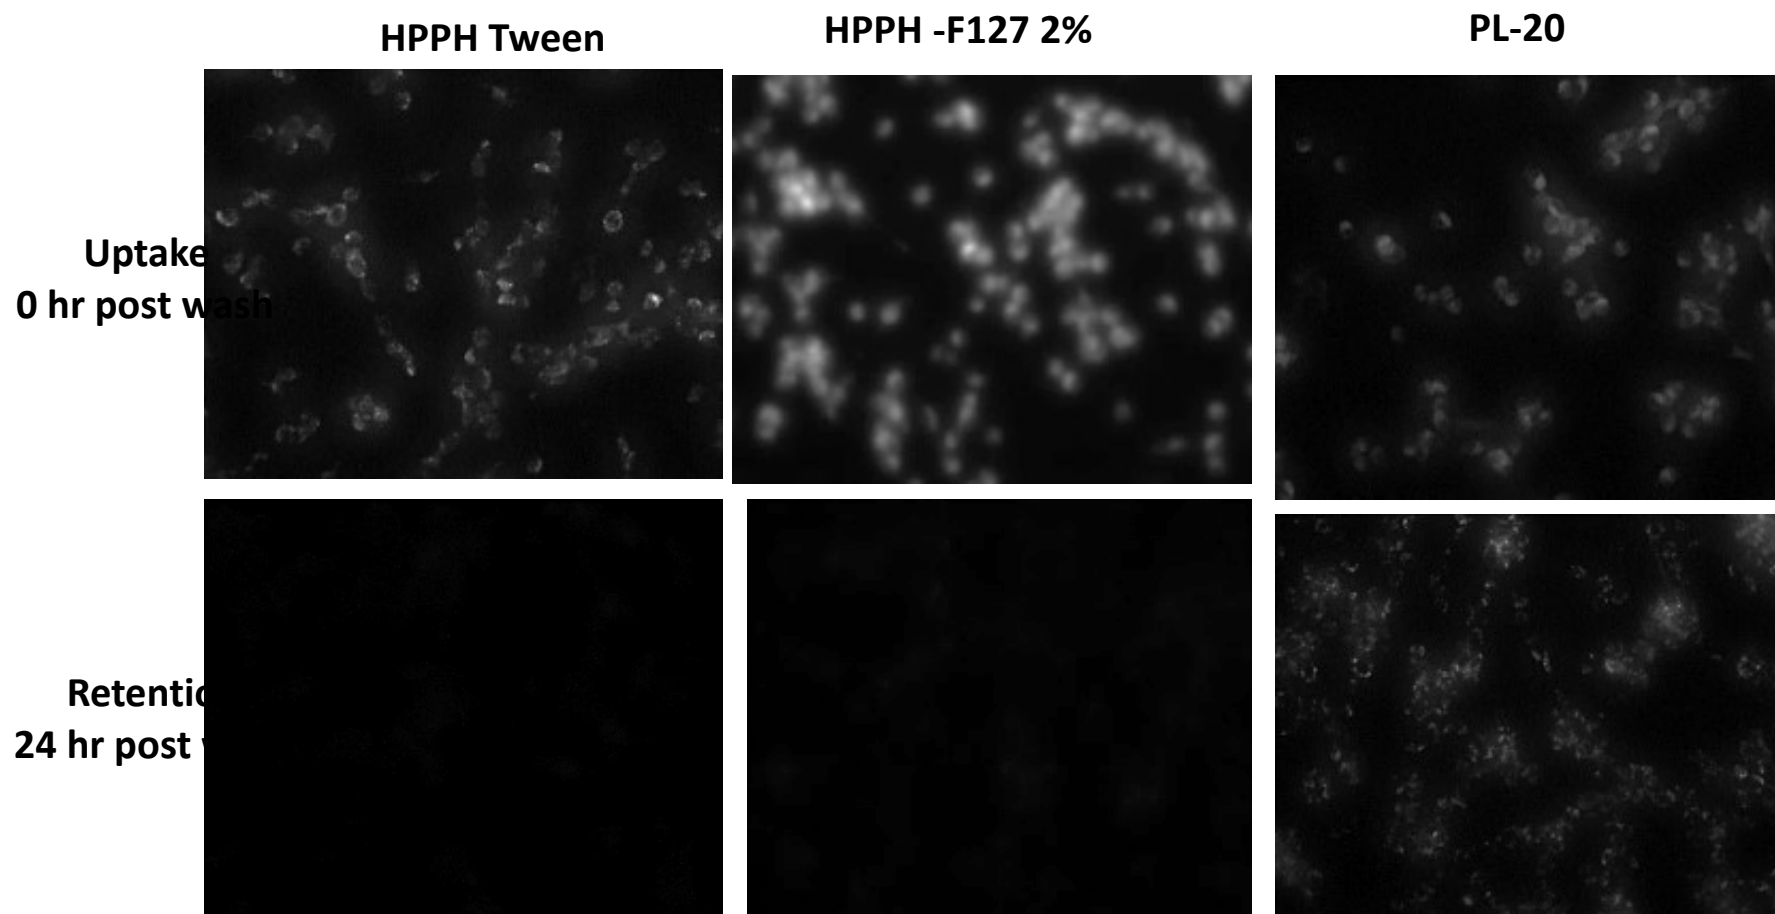

**Figure S1:** Tumor-uptake and retention of HPPH formulated in various delivery vehicles
